# Supplementary material
Source: PubMed Central journal article supplement (PMC3023462)

## Supplemental Table S1

| Primer set            | Direction | Primer (5'-3')                                     |
|-----------------------|-----------|----------------------------------------------------|
| 717 bp CD10 promoter  | Forward   | GAATGGTACCCAGTATGAATTCCGCAGTGGAGTGTG               |
|                       | Reverse   | GAATCCCGGGACCGGAGACTATAATGCTTGCCTC                 |
| *PU-1 mutant primers  | Forward   | CCTGTGATTCAAAA <u>CAC</u> CAAAGGGATC               |
|                       | Reverse   | GATCCCTTTGGT <u>G</u> TTTTGAATCACAGG               |
| pGL3 specific primers | Forward   | CATTCAGGCTGCGCAACTGTTGGG                           |
|                       | Reverse   | CAACAGTACCGGAATGCCAAGC                             |
| RT-PCR huCD10         | Forward   | CTGGAGATTCATAATGGATCTTGTAAGCAGC                    |
|                       | Reverse   | CCATCCAAGTGAGGTCATCTAAAGTCTG                       |
| RT-PCR huBIC          | Forward   | AAGAACAACCTACCAGAGACCTTAC                          |
|                       | Reverse   | AATGATAAAAACAAACATGGGCTTGAC                        |
| RT-PCR huREL          | Forward   | GCTATCACAGAACCCGTAACAG                             |
|                       | Reverse   | ACCCCTGTAGGCATTTCTCTCACA                           |
| RT-PCR huGAPDH        | Forward   | TGGTATCGTGGAAGGACTCATGAC                           |
|                       | Reverse   | ATGCCAGTGAGCTTCCCGTTCAGC                           |
| RT-PCR chickPU.1      | Forward   | GTGAAACAGGCAGCAAGAAAAAG                            |
|                       | Reverse   | CCCTGTCTTGCCGTAGTTTCTC                             |
| RT-PCR chickGAPDH     | Forward   | CCTCTCTGGCAAAGTCCAAG                               |
|                       | Reverse   | CATCTGCCCATTTGATGTTG                               |
| RT-PCR humiR-155      | Forward   | GCCGTCTTAATGCTAATCGTGAT                            |
|                       | Reverse   | CGCCTGGGAATACCGGGTG                                |
| RT-PCR hu5S rRNA      | Forward   | GTGCAGGGTCCGAGGT                                   |
|                       | Reverse   | CGCCTGGGAATACCGGGTG                                |
| miR-155 stem-loop     | Forward   | GTTGGCTCTGGTGCAGGGTCCGAGGTATTCGCACCAGAGCCAACACCCCT |
| 5S stem-loop          | Forward   | GTTGGCTCTGGTGCAGGGTCCGAGGTATTCGCACCAGAGCCAACAAAGCC |
| Universal reverse     | Reverse   | GTGCAGGGTCCGAGGT                                   |
| pCD10-1-470-luc       | Forward   | GAATGGTACCCAGTATGAATTCCGCAGTGGAGTGTG               |
|                       | Reverse   | GAATCCCGGGCTGAACTGAAACTCTCCGCTCC                   |
| pCD10-449-717-luc     | Forward   | GAATGGTACCGGAGCGGAGAGTTTCAGTTCAG                   |
|                       | Reverse   | GAATCCCGGGACCGGAGACTATAATGCTTGCCTC                 |

\* Mutant residues are underlined.

### Other Oligos

| shRNAs  | Stand     | Oligo (5'-3')                                                     |
|---------|-----------|-------------------------------------------------------------------|
| PU.1    | Sense     | GATCCGAAGCTCACCTACCAGTTCTTCAAGAGAGAACTGGTAGGTGAGCTTCTTTTTTACGCGTG |
|         | Antisense | AATTCACGCGTAAAAAAGAAGCTCACCTACCAGTTCTCTTTGAAGAACTGGTAGGTGAGCTTCG  |
| Control | Sense     | GATCCGCAAGCTGCCCGTGCCCTGTTCAAGAGACAGGGCACGGGACGCTTGCTTTTTTACGCGTG |
|         | Antisense | AATTCACGCGTAAAAAAGCAAGCTGCCCGTGCCCTGTCTTTGAACAGGGCACGGGACGCTTGCG  |

| EMSAs | Stand     | Oligo (5'-3')                 |
|-------|-----------|-------------------------------|
| PU-1  | Sense     | TCGAGATTCAAAAAGAGGAAAGGGATCAG |
|       | Antisense | TCGACTGATCCCTTTCTCTTTTGAATC   |
| PU-2  | Sense     | TCGACCTTTGAGGAGGAATCGCTGTGT   |
|       | Antisense | TCGAACACAGCGATTCCCTCCTCAAAGGG |
| PU-3  | Sense     | TCGAGGATTCAGGGAGGAAAGGGAGCGG  |
|       | Antisense | TCGACCGCTCCCTTTCTCTCCCTGAATCC |
| NF-κB | Sense     | TCGAGAGGTCGGGAAATTCCCCCCCG    |
|       | Antisense | TCGACGGGGGGGAATTTCCCGACCTC    |

DNA binding sites in EMSA probes are underlined.

SUPPLEMENTAL FIGURE 1. **Non-consensus PU.1 binding sites in the *CD10* promoter**

**might be activating CD10 expression.** *A*, The 717 base pair region of the *CD10* promoter contains three putative PU.1 binding sites (PU-1, PU-2, PU-3) with the consensus sequence of GAGGAA and two regions (PU-4, AAGGAA repeat) with non-consensus sequences of AAGGAA. This region of the *CD10* promoter was split into two sections by PCR amplification from the pCD10-luc vector to make pCD10-1-470-luc and pCD10-449-717-luc using primers listed in Table S1. The PCR products were purified using the UltraClean 15 DNA Purification Kit (MO BIO Laboratories), digested with KpnI and XmaI, and subcloned into the pGL3 promoter vector (Promega). Reporter gene assays were carried out as described previously. *B*, Reporter gene assays showed that both halves of the *CD10* promoter (pCD10-1-470-luc and pCD10-449-717-luc) contributed approximately equal amounts of PU.1-induced transcriptional activation as the full 717 bp *CD10* promoter region.

# Supplemental Figure S1

## A

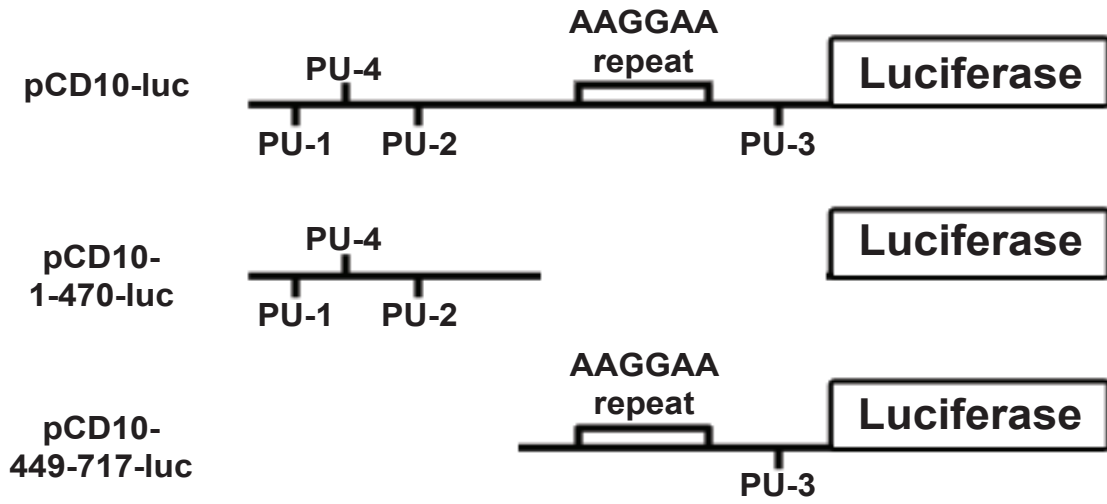

## B

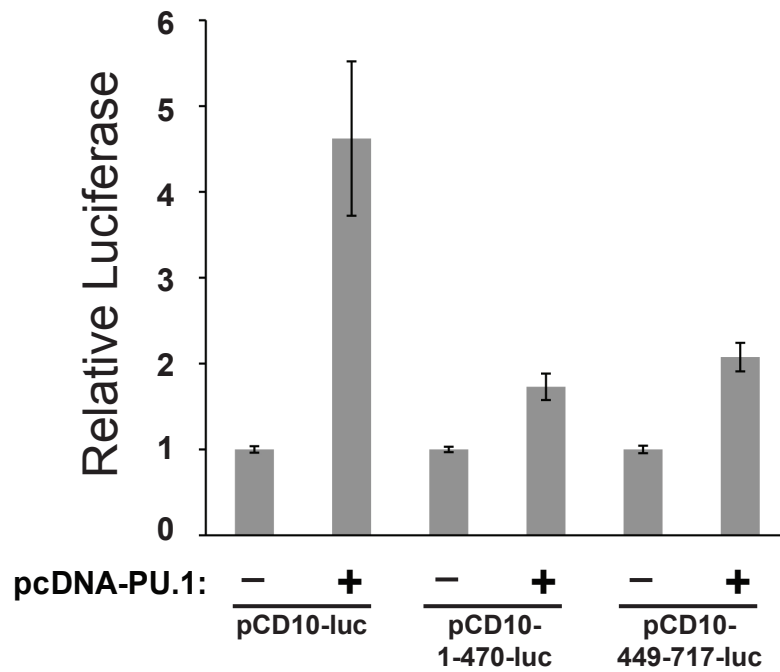

Supplement: supp_M110.177063_jbc.M110.177063-1.pdf [file supp_M110.177063_jbc.M110.177063-1.pdf]
